# Supplementary material for: Relationship between Vision-Related Quality of Life and Central 10° of the Binocular Integrated Visual Field in Advanced Glaucoma
Source: PubMed Central journal article supplement (PMC6802178; doi:10.1038/s41598-019-50677-0), 2019-10-18
Supplement: 41598_2019_50677_MOESM1_ESM.pdf [file 41598_2019_50677_MOESM1_ESM.pdf]

## Appendix.

## Sumi's vision-related quality of life (VRQoL) questionnaire

| Response Category Score        |                                                                               | 0          | 1               | 2   |
|--------------------------------|-------------------------------------------------------------------------------|------------|-----------------|-----|
| Legibility of letters: letters |                                                                               |            |                 |     |
| 1                              | Can you read the headline of a newspaper?                                     | No         | With difficulty | Yes |
| 2                              | Can you read small print in a newspaper?                                      | No         | With difficulty | Yes |
| 3                              | Can you read words in a dictionary?                                           | No         | With difficulty | Yes |
| 4                              | Can you see the numbers in a telephone director?                              | No         | With difficulty | Yes |
| 5                              | Can you make out a fare table for trains and subway?                          | No         | With difficulty | Yes |
| Sentences                      |                                                                               |            |                 |     |
| 6                              | Do you have difficulty reading and writing?                                   | Frequently | Occasionally    | No  |
| 7                              | When you write sentences in vertical lines, does it lean to either direction? | Frequently | Occasionally    | No  |
| 8                              | When you read, can you find the next line easily?                             | No         | With difficulty | Yes |
| Walking                        |                                                                               |            |                 |     |
| 9                              | Do you have difficulty because of your visual problem?                        | Frequently | Occasionally    | No  |
| 10                             | Can you take a walk by yourself?                                              | No         | With difficulty | Yes |
| 11                             | Do you misjudge traffic signals?                                              | Frequently | Occasionally    | No  |
| 12                             | Do you bump into people or objects while walking?                             | Frequently | Occasionally    | No  |
| 13                             | Do you stumble on the stairs?                                                 | Frequently | Occasionally    | No  |
| 14                             | Do you fail to notice changes in the ground?                                  | Frequently | Occasionally    | No  |
| 15                             | Do you fail to recognize your friends until they talk to you?                 | Frequently | Occasionally    | No  |
| 16                             | Do you fail to see people or cars approaching you from the side?              | Frequently | Occasionally    | No  |
| Going Out                      |                                                                               |            |                 |     |
| 17                             | Do you have difficulty going out because of your visual problem?              | Frequently | Occasionally    | No  |
| 18                             | Do you need somebody to accompany you to go to a new place?                   | Yes        | Preferably      | No  |
| 19                             | Can you get a cab by yourself?                                                | No         | With difficulty | Yes |
| 20                             | Do you have traveling by train?                                               | Frequently | Occasionally    | No  |
| 21                             | Do you feel uneasy going out at night because of your visual problem?         | Frequently | Occasionally    | No  |
| Dining                         |                                                                               |            |                 |     |
| 22                             | Do you have difficulty dining because of your visual problem?                 | Frequently | Occasionally    | No  |
| 23                             | Do you drop food while dining because of your visual problem?                 | Frequently | Occasionally    | No  |
| 24                             | Do you spill tea while pouring into a cup?                                    | Frequently | Occasionally    | No  |
| 25                             | Do you have difficulty using chopsticks?                                      | Frequently | Occasionally    | No  |
| Dressing                       |                                                                               |            |                 |     |
| 26                             | Do you ever button up clothing in the wrong order?                            | Frequently | Occasionally    | No  |
| 27                             | Can you see your face clearly in the mirror?                                  | No         | With difficulty | Yes |
| Miscellaneous                  |                                                                               |            |                 |     |
| 28                             | Can you recognize people's faces on TV?                                       | No         | With difficulty | Yes |
| 29                             | Do you have difficulty finding objects dropped on the floor?                  | Frequently | Occasionally    | No  |
| 30                             | Do you have difficulty dialling the telephone?                                | Frequently | Occasionally    | No  |

Title: Relationship between Vision-Related Quality of Life and Central 10° of the Binocular Integrated Visual Field in Advanced Glaucoma

(18/20 words)

Short Title: Central 10° visual field and visual disability

Authors: *Yoshio Yamazaki*<sup>1</sup>, *Kenji Sugisaki*<sup>2,3</sup>, *Makoto Araie*<sup>3,4</sup>, *Hiroshi Murata*<sup>3</sup>, *Akiyasu Kanamori*<sup>5</sup>, *Toshihiro Inoue*<sup>6</sup>, *Shinichiro Ishikawa*<sup>7</sup>, *Keiji Yoshikawa*<sup>8</sup>, *Hidetaka Maeda*<sup>5</sup>, *Yuko Yamada*<sup>5</sup>, *Akira Negi*<sup>5</sup>, *Masaru Inatani*<sup>6</sup>, *Hidenobu Tanihara*<sup>6</sup>, *Satoshi Okinami*<sup>7</sup>, *Kenji Mizuki*<sup>9</sup>, *Koichi Mishima*<sup>3,10</sup>, *Kenichi Uchida*<sup>3,10</sup> and *Shun Matsumoto*<sup>10</sup>

Authors' Institutions:

<sup>1</sup>Department of Ophthalmology, Tokai University Tokyo Hospital, Tokyo, Japan

<sup>2</sup>Department of Ophthalmology, International University of Health and Welfare, Mita Hospital, Tokyo, Japan

<sup>3</sup>Department of Ophthalmology, University of Tokyo Graduate School of Medicine, Tokyo, Japan

<sup>4</sup>Department of Ophthalmology, Kanto Central Hospital of the Mutual Aid Association of Public School Teachers, Tokyo, Japan

<sup>5</sup>Department of Surgery, Division of Ophthalmology, Kobe University Graduate School of Medicine, Kobe, Japan

<sup>6</sup>Department of Ophthalmology, University of Kumamoto Graduate School of Medicine, Kumamoto, Japan

<sup>7</sup>Department of Ophthalmology, University of Saga Graduate School of Medicine, Saga, Japan

<sup>8</sup>Yoshikawa Eye Clinic, Machida, Japan

<sup>9</sup>Department of Ophthalmology, Nihon University School of Medicine, Tokyo, Japan

<sup>10</sup>Department of Ophthalmology, Tokyo Post and Telecommunication Hospital, Tokyo, Japan

**Corresponding author:**

Yoshio Yamazaki, M.D., Ph.D.

Department of Ophthalmology, Tokai University Tokyo Hospital, 1-2-5, Yoyogi, Shibuya-ku, Tokyo 151-0053, Japan

Tel.: +81-3-3370-2321, Fax: +81-3-5354-5366,

E-mail: [yamazaki.yoshio@tokai.ac.jp](mailto:yamazaki.yoshio@tokai.ac.jp)
